# Supplementary material
Source: ML conference proceedings conference paper supplement (https://openaccess.thecvf.com/content/CVPR2023/html/Li_Rethinking_Out-of-Distribution_OOD_CVPR_2023_paper.html)
Supplement: Supplementary file 1 [file Li_Rethinking_Out-of-Distribution_OOD_CVPR_2023_supplemental.pdf]

## A. Appendix

This supplementary material includes experimental configurations, tables of the figures, visualizations, etc., which are not included in the main paper due to page limitations.

### A.1. Algorithm

The algorithm of MOOD is shown Algorithm 1.

---

#### Algorithm 1 Masked Image Modeling Out-of-distribution Detection Algorithm

---

**Require:** Pre-train set  $X_P$ , in-distribution set  $X_{ID}$ , test set  $X_{test}$ , required True Positive Rate  $\eta\%$ .

**Ensure:** Is  $x_{test}$  outlier or not?  $\forall x_{test} \in X_{test}$ .

- 1: Partition  $X_{ID}$  into the training set  $X_{train}$  and calibration set  $X_{cal}$ .
- 2: Pre-train  $f_{ViT}$  on  $X_P$  by maximizing

$$\sum_{x \in X_P} \mathbb{E}_M \left[ \sum_{i \in M} \log p_{MIM}(z|x^M) \right]$$

- 3: Intermediately Fine-tune  $f_{ViT}$  on  $X_P$  by minimizing ▷ Not for one-class OOD detection except on ImageNet-30.

$$L_{interft} = \sum_{x_p \in X_P} \text{CrossEntropy}(f_{ViT}(x_p), y_P(x_p))$$

- 4: Fine-tune  $f_{ViT}$  on  $X_{train}$  by minimizing ▷ Not for one-class OOD detection on ImageNet-30.

$$L_{train} = \sum_{x \in X_{train}} \text{CrossEntropy}(f_{ViT}(x), y^{LS}(x))$$

where  $y^{LS}$  is defined by

$$y_c^{LS} = y_c(1 - \alpha) + \alpha/N_c, \quad c = 1, 2, \dots, N_c$$

where  $c$  is the index of category;  $N_c$  is the number of classes; and  $\alpha$  is the hyperparameter that determines smoothing level.

- 5:  $h(x) = f_{ViT}(x)$  for  $x \in X_{train} \cup X_{test} \cup X_{cal}$ .
- 6: Use  $h(x)$  to calculate  $d(x_{test})$  for  $x_{test} \in X_{test}$  and  $d(x_{cal})$  for  $x_{cal} \in X_{cal}$ , where  $d(\cdot)$  is defined by

$$d_2(x) = \left[ (h(x) - \mu)^T \Sigma^{-1} (h(x) - \mu) \right]$$

where  $\mu$  and  $\Sigma$  are the mean and covariance of the encoding vectors  $h(x)$  of the ID training set  $X_{train}$ .

- 7: Compute threshold  $T$  as the  $\eta$  percentile of  $d(x_{cal})$ .
  - 8: **if**  $d(x_{test}) > T$  **then**
  - 9:      $x_{test}$  is an outlier.
  - 10: **end if**
- 

### A.2. Experimental Configuration

We directly utilize the pre-training model released by BEiT [1], which borrows the tokenizer from OpenAI’s DALL-E [3] and learns the image tokenizer via a discrete variational autoencoder. During fine-tuning, we follow BEiT and represent the image as a sequence of discrete tokens obtained by an image tokenizer. we randomly crop and resize images in CIFAR to  $224 \times 224$ . Then we split each  $224 \times 224$  image into a  $14 \times 14$  grid of image patches, where each patch is  $16 \times 16$ . The patches are linearly-connected and input to the ViT. Our augmentation policy includes random resized cropping, horizontal flipping, and color jittering. More configuration details in the experiments are shown in Tab. A1.

### A.3. Detailed Results of One-class OOD Detection

In this section, we exhibit detailed results of one-class OOD detection. Tab. A2 presents the confusion matrix of AUROC values of our method on one-class CIFAR-10. The results align with the human intuition that ‘car’ is confused for ‘truck’ and ‘cat’ is confused for ‘dog.’ Tab. A3 shows the AUROC of each ID class on ImageNet-30. Tab. A4 presents the OOD detection results of various methods on one-class CIFAR-100 (super-classes).

| Baseline  | Patch Size | Embed Dimension | Depth | Number of Heads | MLP Ratio | Input Resolution |
|-----------|------------|-----------------|-------|-----------------|-----------|------------------|
| ViT-Large | 16         | 1024            | 24    | 16              | 4         | 224              |

(a) Configuration of the ViT.

| Type        | Dataset  | Intermediate Fine-Tuned | Learning Rate      | Warmup Epochs | Epochs | Update Frequency | Layer Decay | Drop Path | Weight Decay       | Batch Size |
|-------------|----------|-------------------------|--------------------|---------------|--------|------------------|-------------|-----------|--------------------|------------|
| One-Class   | CIFAR    | ✓                       | $2 \times 10^{-3}$ | 5             | 90     | 2                | 0.85        | 0.1       | 0.05               | 64         |
|             | ImageNet | ×                       | $2 \times 10^{-3}$ | 5             | 90     | 2                | 0.85        | 0.1       | 0.05               | 64         |
| Multi-Class | CIFAR    | ✓                       | $2 \times 10^{-5}$ | 5             | 30     | 2                | 0.9         | 0.4       | $1 \times 10^{-8}$ | 32         |
|             | ImageNet | ✓                       | $2 \times 10^{-5}$ | 5             | 50     | 2                | 0.9         | 0.4       | $1 \times 10^{-8}$ | 32         |

(b) Configuration of training. CIFAR represents CIFAR-10 and CIFAR-100, and ImageNet represents ImageNet-30.

Table A1. Experimental Configuration

|       | Plane | Car  | Bird  | Cat  | Deer  | Dog   | Frog  | Horse | Ship  | Truck | Mean |
|-------|-------|------|-------|------|-------|-------|-------|-------|-------|-------|------|
| Plane | -     | 99.0 | 99.3  | 99.6 | 99.6  | 99.8  | 99.8  | 99.4  | 94.5  | 98.5  | 98.8 |
| Car   | 99.6  | -    | 100.0 | 99.9 | 100.0 | 100.0 | 100.0 | 99.9  | 99.2  | 93.1  | 99.1 |
| Bird  | 96.0  | 99.5 | -     | 94.2 | 83.8  | 95.7  | 95.0  | 94.3  | 98.7  | 99.4  | 95.2 |
| Cat   | 97.5  | 98.4 | 95.7  | -    | 92.6  | 75.5  | 92.5  | 95.5  | 98.6  | 98.5  | 93.9 |
| Deer  | 99.6  | 99.9 | 96.9  | 97.9 | -     | 98.3  | 98.8  | 100.0 | 100.0 | 100.0 | 99.1 |
| Dog   | 99.8  | 99.9 | 99.2  | 83.3 | 96.4  | -     | 99.2  | 95.5  | 100.0 | 99.9  | 97.0 |
| Frog  | 99.8  | 99.9 | 99.4  | 98.4 | 99.0  | 99.5  | -     | 99.8  | 99.9  | 99.9  | 99.5 |
| Horse | 99.7  | 99.8 | 99.4  | 99.4 | 95.6  | 99.2  | 99.9  | -     | 99.9  | 99.8  | 99.2 |
| Ship  | 96.3  | 97.9 | 99.9  | 99.8 | 99.8  | 99.9  | 100.0 | 99.7  | -     | 97.5  | 99.0 |
| Truck | 98.9  | 87.8 | 100.0 | 99.9 | 100.0 | 100.0 | 100.0 | 99.9  | 98.8  | -     | 98.4 |
| Mean  | 98.6  | 98.0 | 98.9  | 96.9 | 96.3  | 96.4  | 98.4  | 98.2  | 98.8  | 98.5  | 97.9 |

Table A2. Confusion matrix of AUROC (%) values of MOOD on one-class CIFAR-10. The rows and columns indicate the in-distribution and out-of-distribution classes, and the final column indicates the mean value.

| ID class | 0    | 1    | 2    | 3    | 4    | 5    | 6    | 7    | 8    | 9    | 10   | 11   | 12   | 13   | 14   |
|----------|------|------|------|------|------|------|------|------|------|------|------|------|------|------|------|
| AUROC(%) | 95.8 | 99.0 | 98.1 | 96.6 | 90.6 | 92.9 | 96.9 | 92.3 | 92.8 | 72.9 | 91.0 | 94.5 | 93.8 | 97.2 | 82.7 |
| ID class | 15   | 16   | 17   | 18   | 19   | 20   | 21   | 22   | 23   | 24   | 25   | 26   | 27   | 28   | 29   |
| AUROC(%) | 97.2 | 94.0 | 82.8 | 74.4 | 94.4 | 89.6 | 90.4 | 96.8 | 94.5 | 80.8 | 96.9 | 96.3 | 90.7 | 94.2 | 98.7 |

Table A3. AUROC (%) of MOOD on one-class ImageNet-30. The columns indicate in-distribution classes.

#### A.4. TSNE plot of ViT and MOOD

The t-SNE plot of the features of the baseline ViT [2] and MOOD is shown in Fig. A1. It shows that the OOD samples are classified into ID categories by baseline ViT. In comparison, the OOD samples are gathered tightly and separated from testing samples with MOOD. This visually explains why our framework has a superior capability for OOD detection.

|      | OC-SVM | DAGMM | DSEBM | ADGAN | Geom | Rot  | Rot+Trans | GOAD | CSI         | ours        |
|------|--------|-------|-------|-------|------|------|-----------|------|-------------|-------------|
| 0    | 68.4   | 43.4  | 64.0  | 63.1  | 74.7 | 78.6 | 79.6      | 73.9 | 86.3        | <b>99.5</b> |
| 1    | 63.6   | 49.5  | 47.9  | 64.9  | 68.5 | 73.4 | 73.3      | 69.2 | 84.8        | <b>94.7</b> |
| 2    | 52.0   | 66.1  | 53.7  | 41.3  | 74.0 | 70.1 | 71.3      | 67.6 | 88.9        | <b>97.7</b> |
| 3    | 64.7   | 52.6  | 48.4  | 50.0  | 81.0 | 68.6 | 73.9      | 71.8 | 85.7        | <b>89.5</b> |
| 4    | 58.2   | 56.9  | 59.7  | 40.6  | 78.4 | 78.7 | 79.7      | 72.7 | 93.7        | <b>96.9</b> |
| 5    | 54.9   | 52.4  | 46.6  | 42.8  | 59.1 | 69.7 | 72.6      | 67.0 | 81.9        | <b>97.1</b> |
| 6    | 57.2   | 55.0  | 51.7  | 51.1  | 81.8 | 78.8 | 85.1      | 80.0 | <b>91.8</b> | 87.3        |
| 7    | 62.9   | 52.8  | 54.8  | 55.4  | 65.0 | 62.5 | 66.8      | 59.1 | 83.9        | <b>97.2</b> |
| 8    | 65.6   | 53.2  | 66.7  | 59.2  | 85.5 | 84.2 | 86.0      | 79.5 | 91.6        | <b>97.2</b> |
| 9    | 74.1   | 42.5  | 71.2  | 62.7  | 90.6 | 86.3 | 87.3      | 83.7 | <b>95.0</b> | 89.8        |
| 10   | 84.1   | 52.7  | 78.3  | 79.8  | 87.6 | 87.1 | 88.6      | 84.0 | <b>94.0</b> | 85.1        |
| 11   | 58.0   | 46.4  | 62.7  | 53.7  | 83.9 | 76.2 | 77.1      | 68.7 | 90.1        | <b>96.9</b> |
| 12   | 68.5   | 42.7  | 66.8  | 58.9  | 83.2 | 83.3 | 84.6      | 75.1 | 90.3        | <b>95.4</b> |
| 13   | 64.6   | 45.4  | 52.6  | 57.4  | 58.0 | 60.7 | 62.1      | 56.6 | 81.5        | <b>97.3</b> |
| 14   | 51.2   | 57.2  | 44.0  | 39.4  | 92.1 | 87.1 | 88.0      | 83.8 | <b>94.4</b> | 93.7        |
| 15   | 62.8   | 48.8  | 56.8  | 55.6  | 68.3 | 69.0 | 71.9      | 66.9 | 85.6        | <b>96.7</b> |
| 16   | 66.6   | 54.4  | 63.1  | 63.3  | 73.5 | 71.7 | 75.6      | 67.5 | 83.0        | <b>93.1</b> |
| 17   | 73.7   | 36.4  | 73.0  | 66.7  | 93.8 | 92.2 | 93.5      | 91.6 | <b>97.5</b> | 95.2        |
| 18   | 52.8   | 52.4  | 57.7  | 44.3  | 90.7 | 90.4 | 91.5      | 88.0 | 95.9        | <b>98.7</b> |
| 19   | 58.4   | 50.3  | 55.5  | 53.0  | 85.0 | 86.5 | 88.1      | 82.6 | 95.2        | <b>97.9</b> |
| Mean | 63.1   | 50.6  | 58.8  | 55.2  | 78.7 | 77.7 | 79.8      | 74.5 | 89.6        | <b>94.8</b> |

Table A4. AUROC (%) of OOD detection methods on one-class CIFAR-100 (super-classes). The rows and columns indicate the in-distribution classes and OOD detection methods. Bold denotes the best results. The results of previous methods are from the research of [5].

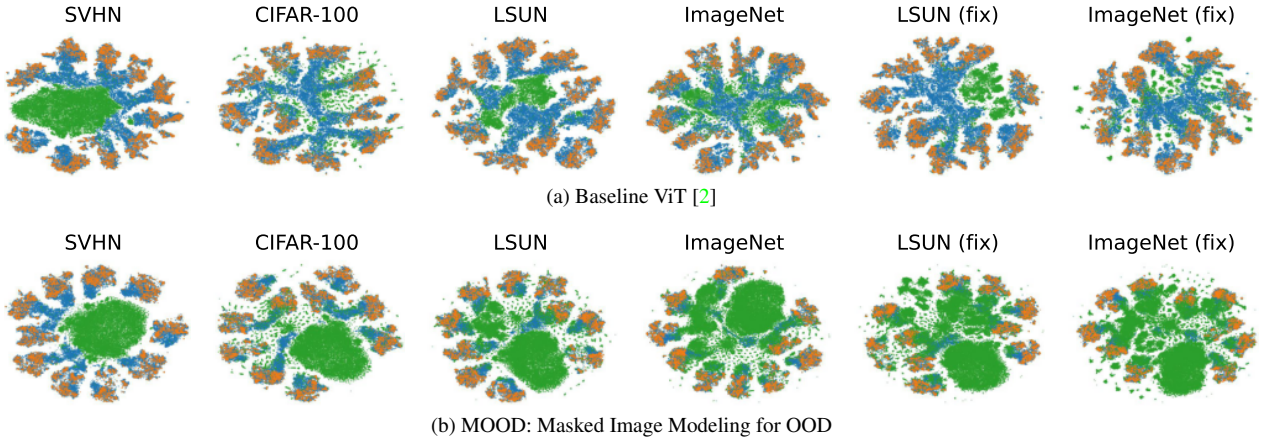

Figure A1. The t-SNE plot of the features on CIFAR-10 of (a) Baseline ViT [2] and (b) MOOD where the subtitles present the out-of-distribution dataset. The three colors represent **training**, **testing** and **out-of-distribution** samples, respectively. It shows that the OOD samples are gathered tightly and separated from testing samples in MOOD, demonstrating its more prominent capability for OOD detection.

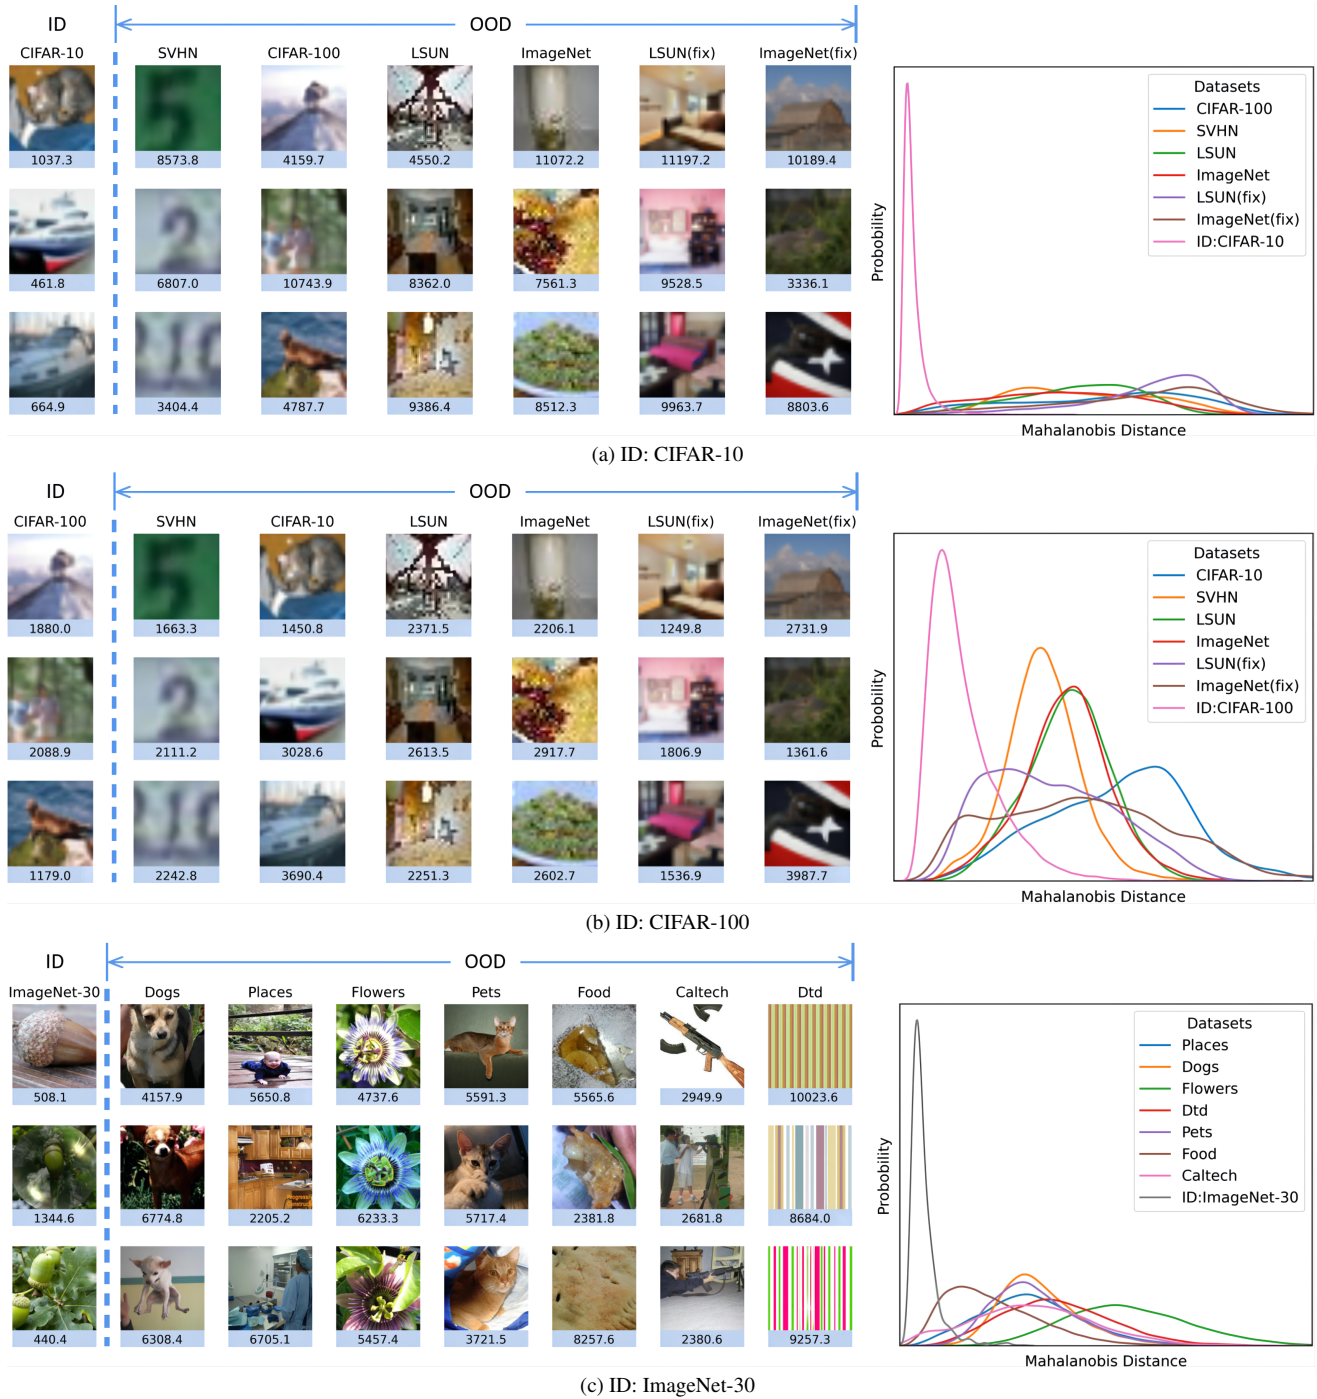

Figure A2. We plot the line chart of the distance distribution and some image examples on three ID datasets: (a) CIFAR-10, (b) CIFAR-100, and (c) ImageNet-30. **Line Chart:** The line chart in each sub-figure illustrates the probability distribution of the Mahalanobis distance from the test samples to the mean of training features. Each line represents an OOD or ID dataset. **Images:** We illustrate three images as examples for each ID dataset and its corresponding OOD datasets. The subtitles of the columns of images are the datasets. The first row represents the ID dataset, while the others represent OOD datasets. The corresponding distance of each image is shown below the image in the light blue box.

## A.5. Visualization of images

In Fig. A2, we plot the probability distances distribution from the test samples to the mean of training features. The distribution of ID and OOD samples illustrates an obvious gap, which shows that our framework, MOOD, has the potential to distinguish OOD samples from ID data. In order to vividly illustrate the appearance of images in each ID and OOD dataset, we also plot several images as examples with their corresponding distances. For example, in Fig. A2c, the distances of ID images are around 1k, while that of the Describable Textures Dataset (DtD) dataset, which appears to be obviously out-of-distribution, is around 10k.

## A.6. Experimental table of mistakenly-classified OOD samples

The mistakenly-classified value in the OOD-ID confusion matrix is shown in Tab. A5, which represents the number of classifying the OOD image to the category in the ID dataset. For example, when the True-Positive Rate (TPR) is 95%, 48 testing tiger images from CIFAR-100 are classified as cats by the current multi-class OOD detection SOTA, SSD+ [4], while only 2 of them are wrongly classified by MOOD. For the listed 12 ID-OOD pairs, MOOD averagely reduces the number of mistakenly-classified OOD samples by 79%.

| Dataset         |                     | # undetected OOD samples |             |           |
|-----------------|---------------------|--------------------------|-------------|-----------|
| In-Distribution | Out-Of-Distribution | SSD [4]                  | MOOD (ours) | (improve) |
| Truck           | Bus                 | 65                       | 34          | 48%       |
| Cat             | Hamster             | 59                       | 1           | 98%       |
| Deer            | Kangaroo            | 43                       | 11          | 74%       |
| Cat             | Leopard             | 59                       | 5           | 92%       |
| Cat             | Mouse               | 41                       | 1           | 98%       |
| Automobile      | Pickup truck        | 56                       | 26          | 54%       |
| Truck           | Pickup truck        | 41                       | 13          | 68%       |
| Truck           | Streetcar           | 78                       | 15          | 81%       |
| Cat             | Tiger               | 48                       | 2           | 96%       |
| Truck           | Tractor             | 61                       | 9           | 85%       |
| Truck           | Train               | 62                       | 15          | 76%       |
| Dog             | Wolf                | 73                       | 9           | 88%       |
| Average         |                     | 56                       | 12          | 79%       |

Table A5. The number of some mistakenly-classified OOD samples (when False-Positive Rate is 95%), that is, classifying to ID category in multi-class detection on CIFAR-10, compared with current SOTA (SSD+ [4]).

## References

- [1] Hangbo Bao, Li Dong, and Furu Wei. Beit: Bert pre-training of image transformers. *arXiv preprint arXiv:2106.08254*, 2021. 1
- [2] Alexey Dosovitskiy, Lucas Beyer, Alexander Kolesnikov, Dirk Weissenborn, Xiaohua Zhai, Thomas Unterthiner, Mostafa Dehghani, Matthias Minderer, Georg Heigold, Sylvain Gelly, et al. An image is worth 16x16 words: Transformers for image recognition at scale. *arXiv preprint arXiv:2010.11929*, 2020. 2, 3
- [3] Aditya Ramesh, Mikhail Pavlov, Gabriel Goh, Scott Gray, Chelsea Voss, Alec Radford, Mark Chen, and Ilya Sutskever. Zero-shot text-to-image generation, 2021. 1
- [4] Vikash Sehwal, Mung Chiang, and Prateek Mittal. Ssd: A unified framework for self-supervised outlier detection. *arXiv preprint arXiv:2103.12051*, 2021. 5
- [5] Jihoon Tack, Sangwoo Mo, Jongheon Jeong, and Jinwoo Shin. Csi: Novelty detection via contrastive learning on distributionally shifted instances. *Advances in neural information processing systems*, 33:11839–11852, 2020. 3
